# Supplementary material for: Exploration of Trends in Interspecific Abundance-Occupancy Relationships Using Empirically Derived Simulated Communities
Source: PLOS journal article supplement (doi:10.1371/journal.pone.0170816), 2017-01-26
Supplement: S3 (10.1371/journal.pone.0170816.s003) [file journal.pone.0170816.s003]

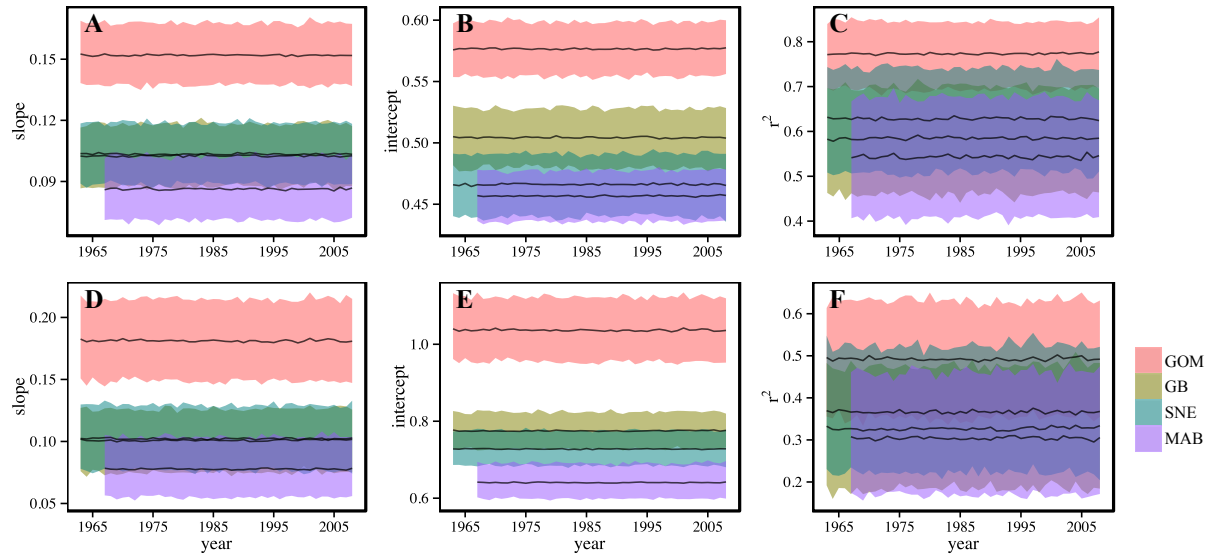

**Figure S2.** Mean AOR regression statistics for simulations with negative binomial (NB) parameters held constant. Results are given for relationships estimated with global mean abundance, GMA (A-C) and local mean abundance, LMA (D-F). In each plot, 95% confidence intervals are color-coded by region. Regions included are the Gulf of Maine (GOM), Georges Bank (GB), Southern New England (SNE), and the Mid-Atlantic Bight (MAB).
